# Supplementary material
Source: publisher site journal article supplement (https://www.dovepress.com/article/supplementary_file/611520/611520%20Supplementary%20Materials.docx)
Supplement: Supplementary file 1 [file 611520%20Supplementary%20Materials.docx]

Supplementary Table 1 Longitudinal Complete Blood Count Parameters in GDM A1 and Normoglycemic Women Across Pregnancy

|  | **GDM A1 group** | **Normoglycemic control group** | P |
| --- | --- | --- | --- |
| White blood cell count, ×10⁹/L |  |  |  |
| 8-12w | 8.14（6.85,9.643） | 8.14（6.74,9.64） | 0.912 |
| 16-20w | 9.25（7.92,10.82） | 8.63（7.33,9.80） | <0.001 |
| 24-28w | 9.51（8.06,10.86） | 8.745（7.65,10.15） | 0.014 |
| 28-32w | 9.015（7.54,10.77） | 8.74（7.58,10.50） | 0.574 |
| 36w | 8.11（6.93,9.38） | 8.6（7.17,10.29） | 0.017 |
| Before delivery | 7.91（6.413,9.73） | 8.76（7.18,10.77） | 0.004 |
| Postpartum | 10.45（8.90,11.96） | 10.065（8.42,11.82） | 0.177 |
| Platelet count, ×10⁹/L |  |  |  |
| 8-12weeks | 233（208.50,267.00） | 222.5（188.50,255.50） | 0.006 |
| 16-20weeks | 227（200.75,259.25） | 218（187.50,253.00） | 0.042 |
| 24-28weeks | 225（193.00,256.00） | 214.5（178.00,242.00） | 0.016 |
| 28-32weeks | 212（180.00,244.00） | 198（168.00,236.00） | 0.006 |
| 36weeks | 197（162.75,226.00） | 190（157.25,225.00） | 0.006 |
| Before delivery | 186（161.00,219.50） | 177（153.00,211.00） | 0.025 |
| Postpartum | 174.5（154.00,206.00） | 181.5（148.00,225.50） | 0.476 |
| Lymphocyte count, ×10⁹/L |  |  |  |
| 8-12weeks | 1.82（1.59,2.10） | 1.71（1.47,2.03） | 0.030 |
| 16-20weeks | 1.69（1.46,2.01） | 1.67（1.40,1.94） | 0.167 |
| 24-28weeks | 1.72（1.38,2.03） | 1.66（1.38,1.95） | 0.432 |
| 28-32weeks | 1.63（1.37,1.93） | 1.62（1.33,1.89） | 0.478 |
| 36weeks | 1.58（1.33,1.92） | 1.59（1.33,1.90） | 0.817 |
| Before delivery | 1.51（1.19,1.74） | 1.52（1.12,1.83） | 0.149 |
| Postpartum | 1.51（1.18,1.83） | 1.57（1.27,1.87） | 0.212 |
| Monocyte count, ×10⁹/L |  |  |  |
| 8-12weeks | 0.38（0.30,0.47） | 0.375(0.30,0.46) | 0.868 |
| 16-20weeks | 0.43（0.35,0.52） | 0.4(0.32,0.48) | 0.015 |
| 24-28weeks | 0.44(0.37,0.54) | 0.42(0.35,0.52) | 0.095 |
| 28-32weeks | 0.46(0.37,0.56) | 0.45(0.37,0.55) | 0.956 |
| 36weeks | 0.45(0.36,0.54) | 0.45(0.37,0.54) | 0.437 |
| Before delivery | 0.41(0.34,0.52) | 0.455(0.36,0.57) | 0.010 |
| Postpartum | 0.5(0.41,0.63) | 0.475(0.38,0.59) | 0.098 |
| Neutrophil count, ×10⁹/L |  |  |  |
| 8-12weeks | 5.625(4.63,7.13) | 5.74(4.645,7.27) | 0.625 |
| 16-20weeks | 6.945(5.85,8.17) | 6.22(5.13,7.43) | <0.001 |
| 24-28weeks | 7.185(6.00,8.37) | 6.475(5.45,7.76) | 0.003 |
| 28-32weeks | 6.865(5.65,8.13) | 6.41(5.38,8.10) | 0.369 |
| 36weeks | 5.845(4.85,7.09) | 6.19(4.85,7.96) | 0.058 |
| Before delivery | 5.875(4.61,7.56) | 6.335(5.03,8.52) | 0.021 |
| Postpartum | 8.37(6.71,9.88) | 7.905(6.22,9.42) | 0.084 |

## Supplementary Table 2 Inflammation-Associated Indices in GDM A1 and Normoglycemic Women Across Pregnancy and Postpartum

| Time Point | AISI | SIRI | SII | LMR | MLR | PLR |
| --- | --- | --- | --- | --- | --- | --- |
| GDM A1 Group |  |  |  |  |  |  |
| 8-12weeks | 283.77 (179.10, 414.68) | 1.13 (0.86, 1.58) | 736.51 (572.25, 939.36) | 5.03 (4.10, 5.79) | 0.20 (0.17, 0.24) | 127.87 (108.89, 151.13) |
| 16-20weeks | 386.00 (269.61, 514.69) | 1.69 (1.24, 2.37) | 873.75 (706.63, 1131.37) | 4.08 (3.36, 5.08) | 0.25 (0.20, 0.30) | 130.23 (110.35, 156.56) |
| 24-28weeks | 411.25 (280.05, 582.77) | 1.87 (1.31, 2.59) | 922.80 (719.56, 1193.78) | 3.86 (3.07, 4.73) | 0.26 (0.21, 0.33) | 130.68 (107.22, 155.56) |
| 28-32weeks | 405.70 (276.36, 584.65) | 1.92 (1.35, 2.60) | 889.78 (666.40, 1148.36) | 3.54 (3.00, 4.36) | 0.28 (0.23, 0.33) | 131.08 (106.33, 159.18) |
| 36weeks | 328.95 (213.90, 458.09) | 1.72 (1.12, 2.31) | 722.64 (553.08, 944.53) | 3.57 (2.95, 4.55) | 0.28 (0.22, 0.34) | 119.25 (99.30, 152.95) |
| Before delivery | 331.96 (210.85, 513.37) | 1.75 (1.17, 2.51) | 745.60 (589.75, 1081.92) | 3.48 (2.85, 4.31) | 0.29 (0.23, 0.35) | 127.37 (103.55, 160.63) |
| Postpartum | 494.95 (344.58, 711.17) | 2.96 (1.87, 4.25) | 956.10 (715.78, 1325.38) | 2.92 (2.16, 3.81) | 0.34 (0.26, 0.46) | 122.72 (94.78, 149.32) |
| Normal Group |  |  |  |  |  |  |
| 8-12weeks | 279.92 (190.88, 427.95) | 1.30 (0.87, 1.81) | 770.19 (590.11, 952.79) | 4.70 (3.62, 5.83) | 0.21 (0.17, 0.28) | 128.12 (110.06, 150.21) |
| 16-20weeks | 330.40 (235.25, 469.07) | 1.55 (1.12, 2.10) | 852.00 (653.84, 1067.80) | 4.18 (3.31, 5.00) | 0.24 (0.20, 0.30) | 128.17 (108.31, 160.31) |
| 24-28weeks | 356.46 (246.26, 545.98) | 1.76 (1.15, 2.38) | 824.39 (649.40, 1091.08) | 3.84 (3.03, 5.00) | 0.26 (0.20, 0.33) | 130.22 (102.94, 154.38) |
| 28-32weeks | 357.76 (261.73, 574.61) | 1.76 (1.31, 2.58) | 801.05 (610.24, 1102.84) | 3.56 (2.82, 4.35) | 0.28 (0.23, 0.36) | 125.29 (102.77, 151.06) |
| 36weeks | 333.68 (226.25, 534.65) | 1.70 (1.26, 2.64) | 744.67 (533.39, 1143.85) | 3.57 (2.71, 4.49) | 0.29 (0.22, 0.37) | 120.25 (92.87, 147.22) |
| Before delivery | 349.60 (223.34, 522.93) | 1.85 (1.30, 2.93) | 735.45 (529.65, 1083.59) | 3.47 (2.65, 4.25) | 0.29 (0.24, 0.38) | 114.12 (94.74, 145.87) |
| Postpartum | 431.08 (247.21, 685.30) | 2.51 (1.35, 3.96) | 902.81 (616.38, 1216.42) | 3.26 (2.41, 4.61) | 0.31 (0.22, 0.42) | 116.67 (93.95, 152.84) |

Supplementary Table 3 Longitudinal AISI Changes Within Groups: Pairwise Comparisons

| GDM A1 Group  Normal Group | 8-12w | 16-20w | 24-28w | 28-32w | 36w | Before delivery | Postpartum |
| --- | --- | --- | --- | --- | --- | --- | --- |
| 8-12w |  | no | Yes | Yes | No | Yes | Yes |
| 16-20w | Yes |  | No | No | No | No | No |
| 24-28w | Yes | No |  | No | No | No | No |
| 28-32w | Yes | No | No |  | No | No | No |
| 36w | No | No | Yes | Yes |  | No | No |
| Before delivery | Yes | No | Yes | Yes |  |  | No |
| Postpartum | Yes | Yes | No | yes | Yes | Yes |  |

Note: “Normal Group” corresponds to the top row, and “GDM A1 Group” corresponds to the first column.

Supplementary Table 4 Longitudinal SIRI Changes Within Groups: Pairwise Comparisons

| GDM A1 Group  Normal Group | 8-12w | 16-20w | 24-28w | 28-32w | 36w | Before delivery | Postpartum |
| --- | --- | --- | --- | --- | --- | --- | --- |
| 8-12w |  | No | Yes | Yes | Yes | Yes | Yes |
| 16-20w | Yes |  | No | Yes | No | Yes | Yes |
| 24-28w | Yes | No |  | No | No | No | Yes |
| 28-32w | Yes | No | No |  | No | No | No |
| 36w | Yes | No | No | No |  | No | Yes |
| Before delivery | Yes | No | No | No | No |  | No |
| Postpartum | Yes | Yes | Yes | Yes | Yes | Yes |  |

Note: “Normal Group” corresponds to the top row, and “GDM A1 Group” corresponds to the first column.

Supplementary Table 5 Longitudinal SII Changes Within Groups: Pairwise Comparisons

| GDM A1 Group  Normal Group | 8-12w | 16-20w | 24-28w | 28-32w | 36w | Before delivery | Postpartum |
| --- | --- | --- | --- | --- | --- | --- | --- |
| 8-12w |  | No | No | No | No | No | Yes |
| 16-20w | Yes |  | No | No | No | No | No |
| 24-28w | Yes | No |  | No | No | No | No |
| 28-32w | Yes | No | No |  | No | No | No |
| 36w | Yes | Yes | Yes | Yes |  | No | No |
| Before delivery | No | Yes | Yes | No | No |  | No |
| Postpartum | Yes | No | No | No | Yes | Yes |  |

Note: “Normal Group” corresponds to the top row, and “GDM A1 Group” corresponds to the first column.

Supplementary Table 6 Longitudinal LMR Changes Within Groups: Pairwise Comparisons

| GDM A1 Group  Normal Group | 8-12w | 16-20w | 24-28w | 28-32w | 36w | Before delivery | Postpartum |
| --- | --- | --- | --- | --- | --- | --- | --- |
| 8-12w |  | No | Yes | Yes | Yes | Yes | Yes |
| 16-20w | Yes |  | No | Yes | Yes | Yes | Yes |
| 24-28w | Yes | Yes |  | No | No | Yes | Yes |
| 28-32w | Yes | Yes | No |  | No | No | No |
| 36w | Yes | Yes | No | No |  | No | No |
| Before delivery | Yes | Yes | Yes | No | No |  | No |
| Postpartum | Yes | Yes | Yes | Yes | Yes | Yes |  |

Note: “Normal Group” corresponds to the top row, and “GDM A1 Group” corresponds to the first column.

Supplementary Table 7 Longitudinal MLR Changes Within Groups: Pairwise Comparisons

| GDM A1 Group  Normal Group | 8-12w | 16-20w | 24-28w | 28-32w | 36w | Before delivery | Postpartum |
| --- | --- | --- | --- | --- | --- | --- | --- |
| 8-12w |  | No | Yes | Yes | Yes | Yes | Yes |
| 16-20w | Yes |  | No | Yes | Yes | Yes | Yes |
| 24-28w | Yes | No |  | No | No | Yes | Yes |
| 28-32w | Yes | Yes | No |  | No | No | No |
| 36w | Yes | Yes | No | No |  | No | Yes |
| Before delivery | Yes | Yes | Yes | No | No |  | No |
| Postpartum | Yes | Yes | Yes | Yes | Yes | Yes |  |

Note: “Normal Group” corresponds to the top row, and “GDM A1 Group” corresponds to the first column.

Supplementary Table 8 Longitudinal PLR Changes Within Groups: Pairwise Comparisons

| GDM A1 Group  Normal Group | 8-12w | 16-20w | 24-28w | 28-32w | 36w | Before delivery | Postpartum |
| --- | --- | --- | --- | --- | --- | --- | --- |
| 8-12w |  | No | No | No | No | Yes | No |
| 16-20w | No |  | No | No | Yes | Yes | Yes |
| 24-28w | No | No |  | No | No | No | No |
| 28-32w | No | No | No |  | No | No | No |
| 36w | No | No | No | No |  | No | No |
| Before delivery | No | No | No | No | No |  | No |
| Postpartum | No | No | No | No | No | No |  |

Note: “Normal Group” corresponds to the top row, and “GDM A1 Group” corresponds to the first column.

## Supplementary Table 9 Exploratory Between-Group P Values for Inflammation-Associated Indices Across Pregnancy and Postpartum

|  | AISI | SIRI | SII | LMR | MLR | PLR |
| --- | --- | --- | --- | --- | --- | --- |
| 8-12w | 0.564 | 0.103 | 0.609 | 0.106 | 0.106 | 0.802 |
| 16-20w | 0.017 | 0.042 | 0.061 | 0.828 | 0.828 | 0.814 |
| 24-28w | 0.030 | 0.088 | 0.036 | 0.697 | 0.697 | 0.510 |
| 28-32w | 0.248 | 0.729 | 0.116 | 0.632 | 0.632 | 0.187 |
| 36w | 0.385 | 0.173 | 0.461 | 0.427 | 0.427 | 0.367 |
| Before delivery | 0.511 | 0.083 | 0.503 | 0.314 | 0.314 | 0.001 |
| Postpartum | 0.025 | 0.033 | 0.054 | 0.022 | 0.022 | 0.375 |

Supplementary Table 10 Key Spearman correlations among CBC-derived inflammatory indices at representative time points

| Group | Time point | AISI–SIRI | AISI–SII | SIRI–MLR | SII–PLR | LMR–MLR | AISI–MLR | AISI–PLR | SIRI–PLR |
| --- | --- | --- | --- | --- | --- | --- | --- | --- | --- |
| GDM A1 | 16–20w | 0.884 | 0.822 | 0.840 | 0.690 | -1.000 | 0.646 | 0.367 | 0.239 |
| GDM A1 | 24–28w | 0.913 | 0.844 | 0.841 | 0.730 | -1.000 | 0.716 | 0.449 | 0.310 |
| GDM A1 | Postpartum | 0.921 | 0.825 | 0.926 | 0.743 | -1.000 | 0.858 | 0.439 | 0.266 |
| Normal | 16–20w | 0.912 | 0.848 | 0.826 | 0.659 | -1.000 | 0.693 | 0.370 | 0.206 |
| Normal | 24–28w | 0.924 | 0.869 | 0.875 | 0.694 | -1.000 | 0.761 | 0.421 | 0.253 |
| Normal | Postpartum | 0.920 | 0.909 | 0.942 | 0.668 | -1.000 | 0.870 | 0.427 | 0.213 |
